# Supplementary material for: Use of Intravaginal Progesterone-Releasing Device Results in Similar Pregnancy Rates and Losses to Long-Acting Progesterone to Synchronize Acyclic Embryo Recipient Mares
Source: MDPI journal article supplement (doi:10.3390/vetsci8090190), 2021-09-10
Supplement: s1 [file s1]

Article

# Use of Intravaginal Progesterone-Releasing Device Results in Similar Pregnancy Rates and Losses to Long-Acting Progesterone to Synchronize Acyclic Embryo Recipient Mares

Lorenzo G .T. M. Segabinazzi <sup>1,2,†</sup>, Luiz R. P. Andrade Jr. <sup>1</sup>, Marco A. Alvarenga <sup>1</sup>, Jose A. Dell'Aqua Jr. <sup>1</sup> and Igor F. Canisso <sup>2,\*</sup>

Supplementary

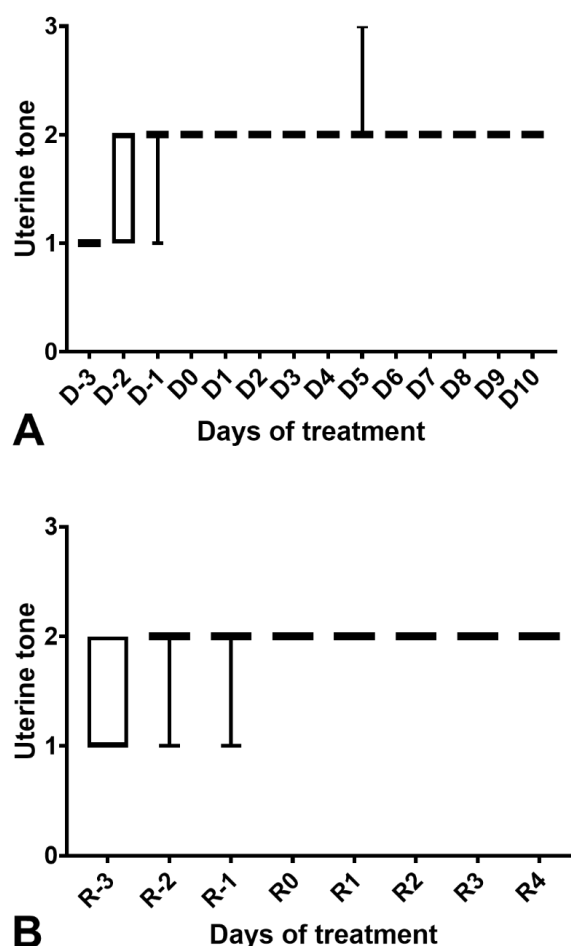

**Figure S1.** Median and interquartile ranges of uterine tone of acyclic mares ( $n = 12$ ). **(A)** Mares were treated with estradiol-17 $\beta$  for 3 days (D-3 to D-1) and then given an intravaginal progesterone releasing device (IPRD, D0). The IPRD was kept for nine days and was then removed (D9). **(B)** Then, the mares were resynchronized three days post-removal of IPRD after the first synchronization. Mares were again treated with estradiol-17 $\beta$  for 3 days (R-3 to R-1) and then had a new IPRD inserted (R0). The IPRD was removed three days (R3) later. Score of 1 represents a flaccid and floppy uterine tone (consistent with anestrus), whereas a score of 3 represents a well-toned, rounded, tubular uterus.
